# Supplementary material for: Is COVID-19 another case of the obesity paradox? Results from an international ecological study on behalf of the REPROGRAM Consortium Obesity study group
Source: PubMed Central journal article supplement — Arch Med Sci. 2021 May 10;19(1):25–34. doi: 10.5114/aoms/136447 (PMC9897093; doi:10.5114/aoms/136447), 2021-05-10
Supplement: AMS-19-1-136447-s1.pdf [file AMS-19-1-136447-s1.pdf]

Supplementary Table S1.

| Rank | Country      | Cases   | Deaths | Cases population | Deaths population | Male BMI | Female BMI | Nationwide obesity rate (%) | GDP per capita | Life expectancy |
|------|--------------|---------|--------|------------------|-------------------|----------|------------|-----------------------------|----------------|-----------------|
| 1    | USA          | 2637077 | 128437 | 7967             | 388               | 29.013   | 29.071     | 36.2                        | 53015          | 78.862          |
| 2    | Brazil       | 1345254 | 57658  | 6329             | 271               | 26.472   | 27.039     | 22.1                        | 13479          | 75.881          |
| 3    | Russia       | 634437  | 9073   | 4347             | 62                | 25.989   | 26.692     | 23.1                        | 23064          | 72.584          |
| 4    | India        | 549197  | 16487  | 398              | 12                | 21.815   | 22.004     | 3.9                         | 5961           | 69.656          |
| 5    | UK           | 311151  | 43550  | 4584             | 642               | 27.475   | 27.152     | 27.8                        | 39162          | 81.321          |
| 6    | Spain        | 295850  | 28343  | 6328             | 606               | 27.163   | 24.93      | 23.8                        | 31556          | 83.565          |
| 7    | Peru         | 279419  | 9317   | 8476             | 283               | 26.366   | 27.278     | 19.7                        | 11540          | 76.736          |
| 8    | Chile        | 271982  | 5509   | 14229            | 288               | 27.992   | 28.344     | 28                          | 21446          | 80.181          |
| 9    | Italy        | 240310  | 34738  | 3975             | 575               | 26.649   | 24.858     | 19.9                        | 34989          | 83.512          |
| 10   | Iran         | 222669  | 10508  | 2651             | 125               | 25.394   | 27.263     | 25.8                        | 15529          | 76.677          |
| 11   | Mexico       | 216852  | 26648  | 1682             | 207               | 27.635   | 28.593     | 28.9                        | 15803          | 75.054          |
| 12   | Pakistan     | 206512  | 4167   | 935              | 19                | 23.417   | 24.807     | 8.6                         | 5250           | 67.273          |
| 13   | Turkey       | 197239  | 5097   | 2339             | 60                | 27.274   | 28.942     | 32.1                        | 18784          | 77.691          |
| 14   | Germany      | 194864  | 9029   | 2326             | 108               | 27.484   | 26.01      | 22.3                        | 46841          | 81.326          |
| 15   | Saudi Arabia | 182493  | 1551   | 5243             | 45                | 28.14    | 29.506     | 35.4                        | 47474          | 75.133          |
| 16   | France       | 162936  | 29778  | 2496             | 456               | 26.072   | 24.312     | 21.6                        | 38758          | 82.659          |
| 17   | South Africa | 138134  | 2456   | 2329             | 41                | 25.105   | 29.592     | 28.3                        | 11949          | 64.131          |
| 18   | Bangladesh   | 137787  | 1738   | 837              | 11                | 21.401   | 22.053     | 3.6                         | 3250           | 72.591          |
| 19   | Canada       | 103250  | 8522   | 2736             | 226               | 27.454   | 26.764     | 29.4                        | 42969          | 82.434          |
| 20   | Qatar        | 94413   | 110    | 33625            | 39                | 28.934   | 30.377     | 35.1                        | 139783         | 80.227          |
| 21   | Colombia     | 91769   | 3106   | 1804             | 61                | 25.991   | 26.755     | 22.3                        | 12963          | 77.287          |
| 22   | China        | 83512   | 4634   | 58               | 3                 | 24.276   | 23.592     | 6.2                         | 12320          | 76.912          |
| 23   | Egypt        | 65188   | 2789   | 637              | 27                | 27.93    | 31.698     | 32                          | 11430          | 71.99           |
| 24   | Sweden       | 65137   | 5280   | 6450             | 523               | 26.864   | 25.46      | 20.6                        | 44371          | 82.797          |
| 25   | Belarus      | 61475   | 383    | 6506             | 41                | 26.63    | 26.912     | 24.5                        | 18766          | 74.791          |
| 26   | Belgium      | 61295   | 9732   | 5289             | 840               | 26.801   | 25.75      | 22.1                        | 39733          | 81.628          |
| 27   | Argentina    | 59933   | 1232   | 1326             | 27                | 28.017   | 27.799     | 28.3                        | 18695          | 76.667          |
| 28   | Ecuador      | 55255   | 4429   | 3132             | 251               | 26.789   | 28.066     | 19.9                        | 10536          | 77.01           |
| 29   | Indonesia    | 54010   | 2754   | 197              | 10                | 22.587   | 23.904     | 6.9                         | 10511          | 71.716          |
| 30   | Netherlands  | 50147   | 6105   | 2927             | 356               | 26.143   | 25.256     | 20.4                        | 49254          | 82.283          |
| 31   | UAE          | 47797   | 313    | 4833             | 32                | 28.188   | 29.638     | 31.7                        | 70284          | 77.972          |
| 32   | Iraq         | 45402   | 1756   | 1129             | 44                | 27.952   | 29.943     | 30.4                        | 13976          | 70.604          |
| 33   | Kuwait       | 44942   | 348    | 10525            | 82                | 29.194   | 30.661     | 37.9                        | 67798          | 75.489          |
| 34   | Singapore    | 43459   | 26     | 7429             | 4                 | 24.402   | 23.143     | 6.1                         | 67180          | 83.62           |
| 35   | Ukraine      | 42982   | 1129   | 983              | 26                | 17.086   | 26.407     | 24.1                        | 9694           | 72.065          |
| 36   | Portugal     | 41646   | 1564   | 4084             | 153               | 26.272   | 25.302     | 20.8                        | 27726          | 82.049          |
| 37   | Oman         | 38150   | 163    | 7474             | 32                | 26.525   | 26.458     | 27                          | 36883          | 77.861          |
| 38   | Philippines  | 35455   | 1244   | 324              | 11                | 22.9     | 23.603     | 6.4                         | 7223           | 71.321          |

Supplementary Table S1. Cont.

| Rank | Country            | Cases | Deaths | Cases population | Deaths population | Male BMI | Female BMI | Nationwide obesity rate (%) | GDP per capita | Life expectancy |
|------|--------------------|-------|--------|------------------|-------------------|----------|------------|-----------------------------|----------------|-----------------|
| 39   | Poland             | 33907 | 1438   | 896              | 38                | 27.64    | 26.15      | 23.1                        | 26002          | 78.73           |
| 40   | Panama             | 31686 | 604    | 7345             | 140               | 26.332   | 27.845     | 22.7                        | 21538          | 78.506          |
| 41   | Switzerland        | 31617 | 1962   | 3653             | 227               | 26.834   | 23.819     | 19.5                        | 61844          | 83.779          |
| 42   | Bolivia            | 31524 | 1014   | 2701             | 87                | 25.422   | 27.927     | 20.2                        | 6118           | 71.513          |
| 43   | Dominican Republic | 31373 | 726    | 2892             | 67                | 25.689   | 27.564     | 27.6                        | 14088          | 75              |
| 44   | Afghanistan        | 31238 | 733    | 796              | 19                | 22.682   | 24.107     | 5.5                         | 1929           | 64.833          |
| 45   | Romania            | 26313 | 1612   | 1368             | 84                | 27.328   | 27.028     | 22.5                        | 18913          | 76.054          |
| 46   | Bahrain            | 25705 | 83     | 15118            | 49                | 24.896   | 24.792     | 29.8                        | 39773          | 77.292          |
| 47   | Ireland            | 25439 | 1735   | 5152             | 351               | 28.095   | 27.203     | 25.3                        | 55653          | 82.305          |
| 48   | Armenia            | 24645 | 426    | 8317             | 144               | 25.744   | 27.195     | 20.2                        | 9588           | 75.087          |
| 49   | Nigeria            | 24567 | 565    | 119              | 3                 | 22.649   | 24.032     | 8.9                         | 5323           | 54.687          |
| 50   | Israel             | 23755 | 318    | 2583             | 35                | 27.828   | 27.12      | 26.1                        | 32494          | 82.972          |
| 51   | Kazakhstan         | 21327 | 178    | 1136             | 9                 | 26.486   | 26.665     | 21                          | 23399          | 73.597          |
| 52   | Japan              | 18390 | 971    | 145              | 8                 | 23.681   | 21.825     | 4.3                         | 36452          | 84.629          |
| 53   | Honduras           | 18082 | 479    | 1826             | 48                | 26.009   | 27.852     | 21.4                        | 4435           | 75.27           |
| 54   | Austria            | 17654 | 702    | 1960             | 78                | 26.673   | 24.749     | 20.1                        | 45010          | 81.544          |
| 55   | Guatemala          | 16930 | 727    | 945              | 41                | 25.831   | 27.491     | 21.2                        | 7137           | 74.302          |
| 56   | Ghana              | 16742 | 112    | 539              | 4                 | 22.59    | 25.39      | 10.9                        | 3753           | 64.074          |
| 57   | Azerbaijan         | 16424 | 198    | 1620             | 20                | 26.247   | 28.154     | 19.9                        | 15296          | 73.005          |
| 58   | Moldova            | 16250 | 530    | 4028             | 131               | 26.781   | 27.584     | 18.9                        | 5851           | 71.901          |
